# Supplementary material for: GenBank2PubMed: Bridging Viral Genomic Data and the Scientific Literature with AI-Assisted Curation
Source: Research Square preprint supplement (doi:10.21203/rs.3.rs-6710551/v1), 2025-05-30
Supplement: Supplementary file 1 [file Supplementary Table 1.xlsx]

## Sheet: Sheet1
Title	Authors	Journal	Accession	Year	AuthorSearch	GPT-4o web search	AutomatedSearch	PubMed Review (+9)	Publication
Detection of a non-fatal case of crimean-congo haemorrhagic fever imported into the uk (ex bulgaria), june 2014	Lumley S., Atkinson B., Dowall S., Simpson A., Aarons E., Petridou C., Nijjar M., Glover S., Brooks T., Atkinson B., Hewson R., Staplehurst S.	Research, Public Health England, Porton Down, Salisbury, Wilts SP40JG, UK, Unpublished	KM201260	2014	✓	✓	✓	✓	25108534
Serological and virological evidence of crimean-congo haemorrhagic fever virus circulation in the human population of borno state, northeastern nigeria	Bukbuk D., Dowall S., Lewandowski K., Bosworth A., Baba S., Varghese A., Bell A., Atkinson B., Hewson R.	Research and Technical Services, Public Health England, Manor Farm Road, Porton, Wiltshire SP4 0JG, UK, Unpublished	KX238956, KX238957, KX238958	2016	✓	✓	✓	✓	27926935
Human cases of cchfv in oman 2012-2014	Atkinson B., Al-abri S., Al-kindi H., Bawakir S., Al-jardani A., Al-abaidani I., Al-mahrooqi S., Al-maani A., Almahrouqi S., Al-rawahi B., Beeching N., Hewson R.	Research, Public Health England, Manor Farm Road, Salisbury, Wiltshire SP4 0JG, UK, Unpublished	MH037279, MH037280, MH037281, MH037282, MH037283, MH037284, MH037285, MH037286, MH037287, MH037288, MH037289, MH037290	2018	✓	✓	✓	✓	31022170
First detection of crimean-congo haemorrhagic fever virus in tick from migratory birds in italy	Mancuso E., Polci A., D'alessio S., Toma L., Di luca M., Orsini M., Di domenico M., Marcacci M., Mancini G., Spina F., Goffredo M., Monaco F.	Viral, Foreign Deseases of Animals, Istituto Zooprofilattico Sperimentale dell'Abruzzo e del Molise 'G. Caporale', Via Campo Boario, Teramo, Abruzzo 64100, Italy, Unpublished	MH576575, MH595794	2018	✓	✓	✓	✓	31211933
Detection of new crimean-congo hemorrhagic fever virus genotypes in ticks feeding on deer and wild boar, spain	Moraga fernandez A., Royo-hernandez L., Habela M., Ruiz fons F., Calero-bernal R., Gortazar C., De la fuente J., Fernandez de mera I.	Sanidad Animal, Instituto de Investigacion en Recursos Cinegeticos, Ronda de Toledo s/n, Ciudad Real 13071, Spain, Lancet (2019) In press	MK297919, MK297920, MK297921, MK297922, MK297923, MK297924, MK297925, MK297926, MK297927, MK297928, MK297929, MK297930, MK297931, MK297932, MK297933, MK297934, MK297935, MK297936	2018, 2019	✓	✓	✓	✓	32738065
Tick-borne arbovirus and rickettsiae surveillance at livestock markets and slaughterhouses in western kenya: implications for dissemination and human infection	Chiuya T., Masiga D., Bastos A., Fevre E.	Mbbu, ICIPE, ICIPE Road, Nairobi 00100, Kenya, Unpublished	MN267048, MN267049	2019	✓	✓	✓	✓	33142046
Collection and screening for cchfv of hyalomma marginatum questing unfed adults in thrace, turkey	Akyildiz G., Kar S., Bircan R.	Department of Biology, Namik Kemal University, Degirmenalti Campus, Tekirdag, Suleymanpasa 59100, Turkey, Unpublished	MN398288, MN398289, MN398290, MN398291, MN398292, MN398293, MN398294, MN398295, MN398296	2019	✓	✓	✓	✓	33388553
Phylogenetic characterisation of crimean-congo hemorrhagic fever virus detected in african blue ticks feeding on cattle in a ugandan abattoir	Wampande E., Allen D., Frost S., Waiswa P., Allen D., Hewson R., Frost S., Stubbs S.	Infectious Disease Epidemiology, London School of Hygiene and Tropical Medicine, Keppel Street, London WC1E 7HT, UK, Preprints (Basel) (2021) In press	MW452933, MW452934, MW452935	2021	✓	✓	✓	✓	33672497
Molecular epidemiology and phylogeny of crimean-congo haemorrhagic fever (cchf) virus of ixodid ticks in khorasan-e-razavi province of iran, Molecular epidemiology and phylogeny of crimean-congo hemorrhagic fever (cchf) virus of ixodid ticks in khorasan-e-razavi province of iran	Maghsood H., Nabian S., Chinikar S., Shayan P.	Parasitology, Faculty of Veterinary Medicine, University of Tehran, Enghalab Square, Tehran 009821, Iran, Parasitology, Faculty of Veterinary Medicine, University of Tehran, Enghalab Square, Tehran, Tehran 009821, Iran, Unpublished	KP682503, KP742979	2015	✓	✓	✓	✓	33954213
Crimean-congo hemorrhagic fever in uganda 2013-2019	Balinandi S., Whitmer S., Nyakarahuka L., Tumusiime A., Kyondo J., Mugisha L., Almberg M., Lutwama J., Shoemaker T., Klena J., Mulei S.	VSPB, CDC, 1600 Clifton Rd. NE, Atlanta, GA 30333, USA, Unpublished	MW464943, MW464944, MW464945, MW464946, MW464947, MW464948, MW464949, MW464950, MW464951, MW464952, MW464953, MW464954, MW464955, MW464956, MW464957, MW464958, MW464959, MW464960, MW464961, MW464962, MW464963, MW464964, MW464965, MW464966, MW464967, MW464968, MW464969, MW464970, MW464971, MW464972, MW464973, MW464974, MW464975, MW464976, MW464977, MW464978, MW464979, MW464980, MW464981, MW464982,…	2021	✓	✓	✓	✓	34662872
Direct Submission	Volynkina A., Kotenev E., Kolosov A.	Laboratory on Natural Focal Infections, Stavropol State Research Anti-Plague Institute, Sovetskaya str. 13-15, Stavropol, Stavropol Region 355035, Russian Federation, Laboratory on Natural Focal Infections, Stavropol State Research Anti-Plague Institute, Sovetskaya str. 13-15, Stavropol, Stavropol region 355017, Russian Federation	MN004855, MN004856, MN004857, MN004858, MN004859, MN004860, MN004861, MN004862, MN004863, MN004864, MN004865, MN004866, MN004867, MN004868, MN004869, MN004870, MN004871, MN004872, MN004873, MN004874, MN004875, MN624267, MN624268, MN624269, MN624270, MN624271, MN624272, MN624273, MN624274, MN624275, MN624276, MN624277, MN624278, MN624279, MN624280, MN624281, MN624282, MN624283, MN624284, MN624285,…	2019	✓	✓	✓	✓	35551538
Transmission dynamics of crimean congo haemorrhagic fever virus (cchfv); evidence of circulation in humans, livestock, and rodents in diverse ecologies in kenya	Omoga D., Tchouassi D., Venter M., Ogola E., Osalla J., Kopp A., Slothouwer I., Torto B., Junglen S., Sang R.	Human Health, ICIPE, ICIPE Road, off Kasarani Road, Nairobi 00100, Kenya, Unpublished	OQ357265, OQ357266, OQ357267, OQ357268, OQ357269, OQ357270, OQ357271, OQ357272	2023	✓	✓	✓	✓	37766297
Complete genome sequencing of crimean-congo haemorrhagic fever virus (cchfv) directly from clinical samples: a comparative study between targeted enrichment and metagenomic approaches, Recovery of complete genome sequences of crimean-congo haemorrhagic fever virus (cchfv) directly from clinical samples: a comparative study between targeted enrichment and metagenomic approaches, Recovery of comple…	D'addiego J., Shah S., Elaldi N., Allen D., Wand N., Afrough B., Fletcher T., Kurosaki Y., Leblebicioglu H., Wand N., Hewson R.	Research & Evaluation, UK Health Security Agency, Manor Farm Road, Salisbury, Wiltshire SP4 0JG, United Kingdom, Unpublished	OQ454691, OQ454692, OQ454693, OQ454694, OQ454695, OQ454696, OQ454697, OQ454698, OQ454699, OQ454700, OQ454701, OQ454702, OQ454703, OQ454704, OQ454705, OQ454706, OQ454707, OQ454708, OQ454709, OQ454710, OQ454711, OQ454712, OQ454713, OQ454714, OQ454715, OQ454716, OQ454717, OQ454718, OQ454719, OQ454720, OQ454721, OQ454722, OQ454723, OQ454724, OQ454725, OQ454726, OQ454727, OQ454728, OQ454729, OQ454730,…	2023, 2024	✓	✓	✓	✓	37879367
Crimean-congo virus in stavropol region of russia, 2011, Genetic monitoring of crimean-congo hemorrhagic fever virus in the south of the european part of russia	Volynkina A., Yashina L., Kulichenko A., Malyshev B., Volynkina A.	Laboratory of Virology, Stavropol Research Anti-Plague Institute, Sovjetskaya St., 13-15, Stavropol, Stavropol Region 355000, Russian Federation, PCR Diagnostics, State Research Center of Virology and Biotechnology 'Vector', SRC VB Vector, Koltsovo, Novosibirsk region 630559, Russia, Probl Osobo Opas Infekc 4 (114), 80-85 (2012), Unpublished	KF425575, KF425576, KF425577, KF425578, KF425579, KF425580, KF425581, KF425582, KF425583, KF425584, KF425585, KF425586, KF425587, KF425588, KF494375, KF496920, KF496921	2012, 2013	✓	✓	✓	✓	25845138, 10.3103/S0891416814040132
Prevalence of crimean congo hemorrhagic fever virus (cchfv) in ixodid ticks in a hyper endemic region in turkey	Bursali A., Tekin S., Mutluay N., Ekici M., Ozkan M., Dundar E.	Biology Department, Balikesir Universitey, Balikesir Universitesi FEF Biyoloji, Balikesir 10145, Turkiye, Unpublished	GU324989, GU324990, GU324991, GU324992, GU324993, GU324994	2009	✓	✓	✓		22119389
Molecular studies of cchf virus circulating in north india	Singh P., Chhabra M., Venkatesh S.	Biotechnology division, National Centre for Diseases Control, 22-Sham Nath Marg, Delhi, Delhi 110054, India, Unpublished	KU041806, KU041807, KU041808	2015	✓	✓	✓		27523802
Outcome of the entomological monitoring for the crimean-congo haemorrhagic fever virus in the western and southern regions of kazakhstan in 2021-2022	Nurmakhanov T., Turebekov N., Tukhanova N., Turebekov N., Tukhanova N., Sadovskaya V., Tokmurziyeva G., Shevtsov A.	Laboratory of applied genetics, National center for biotechnology, Kazakhstan, Kurgalzhynskoye road, 13/5, Astana, Akmola Region 010000, Kazakhstan, Unpublished	OR633376, OR633377, OR633378	2023	✓	✓	✓		39238565
Cchf in ardabil	Mohammadi-ghalehbin B., Soozangar N., Jeddi F., Mirzanejad-asl H., Molaei S., Habibzadeh S., Peeri doghaheh H., Mohammadshahi J., Spotin A.	Parasitolgy and Mycology, Tabriz University od Medical Sceinces, Golgasht Ave, Tabriz, Iran, Tabriz, East Azerbijan 5166/15731, Iran, Unpublished	OR391530, OR391531, OR391532, OR391533, OR391534	2023	✓	✓	✓		40045205
Direct Submission	Midilli K., Gargili A., Ergin S., Sengoz G., Gargili A., Vatansever Z., Ergin S., Aktas M., Yilmaz G., Gargili A., Yilmaz G., Sengoz G., Ozturk R., Altas K.	Microbiology and Clinical Microbiology, Cerrahpasa Medical Faculty of Istanbul University, Temel Bilimler Binasi, Fatih - Istanbul 34303, Turkey, Microbiology and Clinical Microbiology, Cerrahpasa Medical Fakulty of Istanbul University, Temel Bilimler Binasi, Fatih - Istanbul 34303, Turkey	DQ983741, DQ983742, DQ983743, DQ983744, DQ983745, DQ983785, EU057975	2006, 2007	✓		✓	✓	19515251
Cchf virus, isolated from ticks in tajikistan	Petrova I., Kononova Y., Chausov E., Shestopalov A., Tishkova F.	Microscopic Researches, State Research Center of Virology and Biotechnology 'Vector', Koltsovo, Novosibirsk Region 630559, Russia, Unpublished	JQ421100, JQ421101, JQ421102	2012	✓		✓	✓	24364143
Epidemiological analysis of crimean-congo hemorrhagic fever infection case on the territory of crimean federal district in 2015 caused by a new genetic variants of the virus	Popova A., Volynkina A., Kulichenko A., Lisitskaya Y., Burlachenko A., Lisitskaya Y., Shaposhnikova L., Kotenev E., Pisarenko S.	Laboratory of Natural-Focal Infections, Stavropol State Research Anti-Plague Institute, Sovetskaya Str. 13-15, Stavropol, Stavropol Region 355017, Russian Federation, Laboratory of Natural-Focal Infections, Stavropol State Research Anti-Plague Institute, Sovetskaya str. 13-15, Stavropol, Stavropol region 355017, Russian Federation, Zh. Mikrobiol. Epidemiol. Immunobiol. (2016) In press	KR814833, KR814834, KR814835, KR814836, KR814837, KR814838, KR814839, KR814840, KR814841, KR814842, KR814843, KR814844, KR814845, KR814846, KR814847, KR814848, KR814849, KR814850, KR814851, KR814852, KR814853, KR814854, KR814855, KR814856, KR814857, KR814858, KR814859, KR814860, KR814861, KR814862, KR814863, KR814864, KR814865, KR814866, KR814867, KR814868, KR814869, KR814870, KR814871, KR814872,…	2015, 2016	✓		✓	✓	30380211
Direct Submission	Li Y., Yan C.	Key Laboratory of Jilin Province for Zoonosis Prevention and Control, Military Veterinary Institute, Rd. Liuying West 666, Changchun, Jilin 130122, China	MN832721, MN832722, MN832723, MN832724	2019	✓		✓	✓	34763306
Direct Submission	Bendary H., Rasslan F., Zaki A., Zaki A., Abdulall A.	Microbiology and Immunology, Faculty of Pharmacy (Girls), Al-Azhar University, Dr Abd El-Shennawy, Nasr City, Cairo 11765, Egypt, Microbiology and Immunology, Faculty of Pharmacy (Girls), Al-Azhar University, Dr Abd El-Shennawy, Nasr city, Cairo 11765, Egypt	MW424419, MW467897, MW467898, MZ322095, MZ326698, MZ330127, MZ342904, MZ361738	2020, 2021	✓		✓	✓	35531170
Direct Submission	Umair M., Haider S., Jamal Z., Ammar M., Hakim R., Ali Q., Hakim R., Jamal Z., Jamal Z., Ammar M., Haider S., Ali Q., Hakim R., Jamal Z., Haider S., Ammar M., Ali Q., Hakim R., Rehman Z., Ikram A., Haider S., Ammar M., Ali Q., Hakim R., Salman M., Ansari S.	Department of Virology, National Institute of Health, Park Road, Chak Shahzad, Islamabad, Islamabad 44000, Pakistan	MZ287856, MZ287857, MZ287858, MZ287859, MZ287860, MZ287861, OP345188, OP345189, OP345190, OP345191, OP345192, OP345193, OP345194, OP345195, OP345196, OR964910, OR964911, OR964912, OR964913, OR964914, OR964915, OR964916, OR964917, OR964918, OR964919, OR964920, OR964921, OR964922, OR964923, OR964924, OR964925, OR964926, OR964927, OR964928, OR964929, OR964930, OR964931, OR964932, OR964933, OR964934,…	2021, 2022, 2023, 2024	✓		✓	✓	36815488
Molecular identification of crimean-congo haemorrhagic fever virus in livestock ticks in the upper east region of ghana	Addo S., Bentil R., Baako B., Yartey K., Ansah-owusu J., Tawiah-mensah C., Agbodzi B., Kumordjie S., Yeboah C., Asoala V., Dunford J., Larbi J., Baidoo P., Wilson M., Diclaro J.	NAMRU-3, University of Ghana Noguchi Memorial Institute for Medical Research, P O Box LG 581, University of Ghana-Legon, Accra, Legon +233, Ghana, Unpublished	OQ441060, OQ441061, OQ441062	2023	✓		✓	✓	38446223
Direct Submission	Picard C., Baize S.	Virology, Institut Pasteur, 21 Av Tony Garnier, Lyon 69365, France	PP067047, PP067048, PP067049, PP067050, PP067051, PP067052, PP067053, PP067054, PP067055, PP067056, PP067057, PP067058, PP067059, PP067060, PP067061, PP067062, PP067063, PP067064, PP067065, PP067066, PP067067, PP067068, PP067069, PP067070, PP067071, PP067072, PP067073, PP067074, PP067075, PP067076, PP067077, PP067078, PP067079, PP067080, PP067081, PP067082, PP067083, PP067084, PP067085, PP067086,…	2023	✓		✓		38333936
Detection of autochthonic virus strain responsible for outbreak of crimean-congo haemorrhagic fever in north macedonia, july to august 2023, Increased clinical vigilance identified additional human cases and genetically diverse isolates of crimean-congo haemorrhagic fever virus in north macedonia	Jakimovski D., Banovic P., Urban P., Gorfol T., Lanszki Z., Tauber Z., Zana B., Banovic P., Zana B., Abraham A., Lanszki Z., Gorfol T., Tauber Z., Banovic P., Zana B., Abraham A., Lanszki Z., Gorfol T., Tauber Z., Kuczmog A., Banyai K., Spasovska K., Grozdanovski K., Rangelov G., Cvetanovska M., Cana F., Banovic P., Simin V., Bogdan I., Mijatovic D., Cvetkovikj A., Djadjovski I., Christova I., Me…	Szentagothai Research Center, University of Pecs, Ifjusag Utja 20, Pecs, Baranya 7624, Hungary, Szentagothai Research Center, University of Pecs, Ifjusag utja 20, Pecs, Baranya 7624, Hungary, Unpublished	PP729064, PP729065, PP729066, PQ031235, PQ031236, PQ031237, PQ031238, PQ031239, PQ031240	2024	✓		✓		39885822
Direct Submission	Carletti F., Di caro A., Capobianchi M., Castilletti C., Bordi L., Lalle E., Castilletti C., Capobianchi M., Ippolito G., Bordi L., Lalle E., Chiappini R.	Biorepository, National Institute for Infectious Diseases, Via Portuense 292, Rome, RM 00149, Italy, Virology, Laboratory, Via Portuense 292, Rome 00149, Italy	FJ445749, FJ472634	2008		✓	✓	✓	19523314
Direct Submission	Feng C., Zhang Y., Sun S., Meng W., Dai X., Sun S., Meng W., Dai X., Sun S., Dai X., Meng W., Hang C., Wang X.	The Center for Disease Control and Prevention of Xinjiang Uygur Autonomous Region, Xinjiang Key Lab of Biological Resources and Genetic Engineering, College of Life Science and Technology, Xinjiang University, Urumuqi 830046, P.R. China	EU715257, EU715258, EU715259, EU715260, EU715261, EU715262, EU715263, EU715264, EU715265, EU715266, EU715267, EU715269, EU715270, EU715271, EU715272, EU715273, EU715274, EU715275, EU715276, EU715277, EU715279, EU715280, EU715281, EU715282, EU715284, EU715286	2008		✓	✓	✓	19553586
Identification and phylogenetic analysis of the latest isolated crimean-congohemorrhagic fever virus in xinjiang, china	Guo R., Shen S., Zhang Y., Shi J., Su Z., Liu D., Liu J., Yang J., Wang Q., Zhang Y., Deng F.	Wuhan Institute of Virology, China Academy of Science, Xiaohongshan District No. 44, Wuhan, Hubei 430071, China, Unpublished	KY354080, KY354081, KY354082	2016		✓	✓	✓	28251517
Full genome sequencing and phylogenetic characterization of crimean congo hemorrhagic fever virus in spain	Ramirez de arellano E., Hernandez L., Goyanes M., Arsuaga M., Fernandez cruz A., Negredo A., Sanchez-seco M., Perez sautu U.	Arbovirus and Imported Viral Diseases Laboratory, National Center of Microbiology, Institute of Health Carlos III, Crta. Majadahonda a Pozuelo Km 2, Madrid 28220, Spain, Unpublished	MF287636, MF287637, MF287638	2017		✓	✓	✓	29148370
Survey of crimean-congo hemorrhagic fever enzootic focus, spain, 2011-2015	Negredo A., Habela M., Ramirez de arellano E., Lasala F., Lopez P., Sarria A., Labiod N., Calero-bernal R., Tenorio A., Estrada-pena A., Sanchez-seco P.	Arbovirus and Imported Viral Diseases, National Center of Microbiology, Institute of Health Carlos III, Ctra. Majadahonda-Pozuelo, km2, Majadahonda, Madrid 28220, Spain, Emerging Infect. Dis. 25 (6) (2019) In press	MH337845, MH337846, MH337847	2018, 2019		✓	✓	✓	31107219
Occurrence of the neglected arboviruses in the astrakhan region of russia for 2018 season: the development of multiplex pcr assays and analysis of mosquitoes, ticks, and human blood sera	Nikiforova M., Shchetinin A., Kuznetsova N., Butenko A., Kozlova A., Larichev V., Vakalova E., Babaeva M., Arjba T., Akishkin V., Azarian A., Nikeshina N., Rubalsky O., Bashkina O., Tkachuk A., Gintsburg A., Kozlova A., Butenko A., Gushchin V.	Pathogenic Microorganisms Variability Lab, N.F. Gamaleya Research Center of Epidemiology and Microbiology, Gamaleya str., 16, Moscow 123098, Russia, Unpublished	MN987247, MN987248, MN987249	2020		✓	✓	✓	33421655
Direct Submission	Negredo A., Vazquez A., Hernandez L., Sanchez-seco M.	Arbovirus and Imported Viral diseases, National Center of Microbiology, Institute of Health Carlos III, Ctra. Majadahonda-Pozuelo, km2, Majadahonda, Madrid 28220, Spain	MN689739, MN689740, MN689741	2019		✓	✓	✓	33754998
The current status of tick populations in istanbul and their biorisks in terms of cchf and public health	Zarrabi ahrabi S., Akyildiz G., Gargili keles A.	Faculty of Health Sciences/Basic Health Sciences Department, Marmara University, M.U. Basibuyuk Campus, 9/4/1, Maltepe, Istanbul 34854, Turkey, Unpublished	OP312072, OP312073, OP312074, OP312075, OP312076, OQ377559, OQ377560, OQ377561, OQ377562, OQ377563, OQ377564	2022, 2023		✓	✓	✓	37527191
A focal outbreak of crimean congo hemorrhagic fever in ahmadabad, india, 2011	Yadav P., Mourya D.	VR-HCL, National Institute of Virology, Microbial Containment Complex, Sus Road, Pashan, Pune, Maharashtra 411021, India, Unpublished	JF922673, JF922674, JF922675, JF922676, JF922677, JF922678, JF922679, JF922680, JF922681	2011		✓	✓	✓	23195573, 22616022
An isolate of cchf virus from an iranian fulminant cchf patient, An isolate of cchf virus from an iranian patient in north of iran, Crimean congo hemorrhagic fever in qeshm island, iran, eid al adha (eid qorban) 2017	Baniasadi V., Fazlalipour M., Salehi-vaziri M., Ghasemian R., Jalali T., Jamshidi Y., Mohammadi T., Azad-manjiri S., Hosseini M., Azizizadeh S., Mirahmadi R., Khakifirouz S., Pouriayevali M., Jalali T., Mohammadi T., Fereydouni Z., Azad-manjiri S., Hosseini M., Tavakolirad M., Azizizadeh S., Khakifirouz S., Mirghiasi M., Jalali T., Khakifirouz S., Azad-manjiri S., Zarandi R., Salehi-vaziri M., Fa…	Virology, Tehran University of Medical Sciences, No 69, Pasteur Ave, Tehran 0098, Iran, Virology, Tehran University of Medical Sciences, No. 69 Pasteur Ave., Tehran 0098, Iran, Virology, Tehran University of Medical Sciences, No. 69, Pasteur Ave., Tehran 0098, Iran, Unpublished	KT899991, KY274404, MG456911	2015, 2016, 2017		✓	✓	✓	26902209, 32655079
A cluster of inter-human transmission of Crimean-Congo hemorrhagic fever in south-western Bulgaria	Christova I., Di caro A., Papa A., Rezza G., Carletti F., Ippolito G., Capobianchi M., Papadimitriou E., Mohareb E., Castilletti C.		FJ472634	2016		✓	✓		19523314
Identification of diverse viruses in upper respiratory samples in dromedary camels from united arab emirates	Li Y., Khalafalla A., Paden C., Yusof M., Eltahir Y., Al hammadi Z., Tao Y., Queen K., Al hosani F., Gerber S., Hall A., Al muhairi S., Paden C., Tao Y., Khalafalla A., Yusof M., Eltahir Y., Al hammadi Z., Queen K., Al hosani F., Gerber S., Hall A., Al muhairi S., Tong S.	Division of Viral Diseases, Centers for Disease Control and Prevention, 1600 Clifton Rd, Atlanta, GA 30333, USA, Unpublished	MF593474	2017		✓	✓		28902913
Severe undifferentiated febrile illness outbreaks in the federal republic of sudan: a retrospective epidemiological & diagnostic cohort study	Bower H., Carter D., El karsany M., Alzain M., Gannon B., Mohamed R., Mahmoud I., Eldegail M., Taha R., El halawi A., Osman A., Mohamednour S., Semper A., Atkinson B., Dowall S., Furneaux J., Graham V., Mellors J., Osborne J., Slack G., Brooks T., Hewson R., Beeching N., Whitworth J., Bausch D., Gannon B., Fletcher T., Pullan S.	Genomics of Rare and Emerging Human Pathogens, Public Health England, Manor Farm Road, Porton Down, Wiltshire SP4 0JG, United Kingdom, Unpublished	MK442893, MK442894, MK442895	2019		✓	✓		31291242
Orthonairovirus haemorrhagiae in north macedonia, 2023	Bosevska G., Emmerich P., Von possel R., Toth E., Osmani D., Cadar D.	Virus Genomics and Evolution, Bernhard Nocht Institute for Tropical Medicine, Bernhard-Nocht-Strasse 74, Hamburg, Deutschland 20359, Deutschland, Unpublished	PP963968, PP963969, PP963970, PP963971, PP963972, PP963973	2024		✓	✓		39565134
Health risks associated with argasid ticks, transmitted pathogens and blood parasites in european griffon vulture (gyps fulvus) nestlings in spain	Moraga-fernandez A., Sanchez-sanchez M., Munoz-hernandez C., Oliva-vidal P., Martinez J., Margalida A., De la fuente J., Fernandez de mera I.	Department of Science and Agroforestal Technology and Genetics, Institute for Game and Wildlife Research, Ronda Toledo 12, Ciudad Real, Ciudad Real 13005, Spain, Unpublished	OP951067, OP951068, OP951069	2022		✓	✓		10.1007/s10344-023-01741-8
Molecular phylogenetic study on s-segment of crimean-congo hemorrhagic fever (cchf) virus genome isolated from ticks in in west azerbaiajan and sistan and baluchestan provinces, iran, 2010	Majidzadeh K., Soleimani M., Ghalyanchi langrodi A., Morovvati A., Soleimani M., Morovvati A., Razmyar J., Langeroudi A.	Tasnim Biotechnology Research Center, AJA University of Medical Science, West Fatemi St, Tehran, Tehran 1411718541, Iran, Int. J. Infect. Dis. 16, E258 (2012)	JF798866, JF798867, JF798868, JF798869	2011, 2012		✓	✓		10.1016/j.ijid.2012.05.899
Emerging viruses are an underestimated cause of undiagnosed febrile illness in uganda	Ashraf S., Jerome H., Bugembe D., Ssemwanga D., Byaruhanga T., Kayiwa J., Downing R., Salazar-gonzalez J., Salazar M., Shepherd J., Davis C., Logan N., Sreenu V., Wilkie G., Da silva filipe A., Ssekagiri A., Namuwulya P., Bukenya H., Kigozi B., Mcconnell W., Willett B., Balinandi S., Lutwama J., Kaleebu P., Bwogi J., Thomson E.	MRC Centre for Virus Research, University of Glasgow, 464 Bearsden Road, Glasgow G61 1QH, United Kingdom, Unpublished	OQ077991	2022		✓	✓		10.1016/j.ijid.2023.04.042
First whole genome isolation of crimean-congo haemorrhagic fever virus (cchfv) in tick species within ghana	Bentil R., Addo S., Mosore M., Kumordjie S., Yeboah C., Agbodzi B., Behene E., Tagoe J., Baako B., Asoala V., Ampadu R., Mingle D., Nyarko E., Fox A., Letizia A., Diclaro J., Oduro D., Nimo-paintsil S., Harwood J., Dadzie S.	NAMRU-3, University of Ghana Noguchi Memorial Institute for Medical Research, P O Box LG 581, University of Ghana-Legon, Accra, Legon +233, Ghana, Unpublished	OQ441063, OQ441064, OQ441065	2023		✓	✓		10.1155/2023/2063317
Novel segmented rna jingmenvirus group isolated from human	Ternovoi V., Gladysheva A., Sementsova A., Zaykovskaya A., Volynkina A., Kotenev E., Agafonov A., Loktev V.	Department of Molecular Virology, State Research Center of Virology and Biotehnology 'Vector', Koltsovo, Russia 630559, Russia, Unpublished	MN218693, MN218694, MN218695, MN218696	2019		✓	✓		10.15690/vramn1192
Assessment of humoral and cellular immune responses elicited by a dna based vaccine targeting crimean congo hemorrhagic fever virus glycoprotein gc in immunocompetent balb/c mouse model	Sahin E., Farzani T., Coleri cihan A., Ozkul A.	Biology, Ankara University, Dogol Street Tandogan, Ankara 06100, Turkey, Unpublished	MG969426	2018		✓	✓		10.18678/dtfd.864114
Molecular characterization of s and m segments of crimean congo hemorrhagic fever virus in turkey	Timurkan M., Aydin H.	Department of Virology, Ataturk University, Faculty of Veterinary Medicine, Erzurum 25240, Turkey, Departmet of Virology, Ataturk University, Faculty of Veterinary Medicine, Erzurum 25240, Turkey, Unpublished	MT178278, MT178279, MT178280, MT178281, MT178282, MT178283, MT178284, MT178285, MT178286, MT178287, MT178288, MT178289, MT178290, MT178291, MT178292, MT178293, MT178294, MT178295, MT178296, MT178297, MT178298, MT178299, MT178300, MT178301, MT178302, MT178303, MT178304, MT178305, MT178306, MT178307, MT178308, MT178309, MT178310, MT178311, MT178312, MT178313, MT178314, MT178315, MT178316, MT178317,…	2020		✓	✓		10.2217/fvl-2020-0003
Crimean congo hemorrhagic fever virus s segment sequence, strain matin	Meissner J., Sato S., Hazlett L., St. jeor S., Nichol S.	Microbiology, University of Nevada, Reno, MS200/FA310, Reno, NV 89557, USA, Unpublished	AF527810	2002				✓	15935414
Sequencing and analysis of s gene of cchfv	Prehaud C., Tang Q., Bouloy M., Feng C.	Prehaud C.J., Laboratoire des Bunyavirides, Institut Pasteur, 25 rue du Dr Roux, 75724 Paris Cedex 15, FRANCE, Zhonghua Wei Sheng Wu Xue He Mian Yi Xue Za Zhi 19, 461-465 (1999)	AJ010648, AJ010649	1998, 1999				✓	16415986
Cchf genetic variety research	Tang Q., Gao D., Han L., Zhao X., Tao X.	Institute of Epidemiology and Microbiology, Chinese Academy of Preventive Medicine (CAPM), P. O. Box 5 Changping, Beijing 102206, China, Institute of Epidemiology and Microbiology, Chinese Academy of Preventive Medicine (CAPM), P.O. Box 5 Changping, Beijing 102206, China, Institute of Epidemiology and Microbiology, Chinese Academy of Preventive Medicine, P. O. Box 5 Changping, Beijing 102206, P.R…	AF354296, AF358784, AF362080, AY029157	2001				✓	16415986
Genetic characterization of the s and m segments of crimean congo hemorrhagic fever virus strains isolated in iran	Li Q., Nordstrom H., Chinikar S., Plyusnin A., Lundkvist K., Nilsson M.	Centre for Microbiological Preparedness, Swedish Institute for Infectious Disease Control, Nobelsvag 18, Solna 171 82, Sweden, Unpublished	DQ446212, DQ446213, DQ446214, DQ446215, DQ446216	2006				✓	23271164
The characterization of cchfv glycoproteins, The crimean-congo haemorrhagic fever virus genetics and analysis	Zhou Z., Meng W., Deng F., Wang H., Li T., Zhang Y., Sun S., Hu Z.	Molecular Virology and Bioengeneering Research Group, Wuhan Institution of Virology, CAS, Xiaohongshan 44#, Wuhan, Hubei 430071, China, J. Gen. Virol. (2010) In press	GU477492, GU477493, GU477494	2010				✓	23908296
Direct Submission	Chitimia-dobler L.	Parasitology, University of Hohenheim, Schloss Hohenheim 1, Stuttgart, BW 70593, Germany	MN097144	2019				✓	31521854
Second autochthonous case of CCHF infection by tick bite in Spain (2018). Identification of a new virus circulating in West Europe	Sanchez-arroyo R., De ory F., Budino M., Garcinuno M., De la hoz C., Gutierrez A., Diez F.		MN689739, MN689740, MN689741					✓	33754998
Direct Submission	Sado yousseu F.	Microbiology and Parasitology, Centre of Research in Infectious Diseases, Street 1.606 Yaounde 5, Yaounde, Centre POBOX 13591, Yaounde, Cameroon	ON564456	2022				✓	37056704
Direct Submission	Wang J., Wang B., Xia X., Zhou J., Wang Y., Wang Y.	Faculty of Life Science and Technology, Kunming University of Science and Technology, 727 Jingming South Road, Kunming, Yunnan 650000, China	OQ633002, OQ633003, OQ633004	2023				✓	39065234
Genotypes of the congo-crimean hemorrhagic fever virus occurring in the turkestan region	Abuova G., Pshenichnaya N., Karan L., Berdaliyeva F., Aliyev D., Sadyhova D., Polukchi T., Nurmagambet S.	Department of molecular diagnostic and epidemiology, Central Research Institute of Epidemiology, Novogireevskaya 3A, Moscow 111123, Russia, Arch Clin Infect Dis 17 (6), e129126 (2022)	OQ190959, OQ190960, OQ190961, OQ190962, OQ190963, OQ190964, OQ190965, OQ190966, OQ190967, OQ190968, OQ190969	2022, 2023					10.5812/archcid-129126
Genetic diversity of crimean-congo hemorraghic fever virus in russia	Klimentov A., Butenko A., Larichev V., Isaeva O., Gordeychuk I., Gmyl A.	Chumakov Institute of Poliomyelitis and Viral Encephalitides, 27 km Kievskogo shosse, Moscow 142782, Russia, Unpublished	KX056050, KX056051, KX056052, KX056053, KX056054, KX056055, KX056056, KX056057, KX056058, KX056059, KX056060, KX056061	2016
Direct Submission	Ashraf S., Love H., Burton C., Carmichael S., Filipe A., Roddy S., Smollett K., Summers S., Tong L., Richards K., Thomson E.	MRC Centre for Virus Research, University of Glasgow, 464 Bearsden Road, Glasgow G61 1QH, United Kingdom, MRC Centre for Virus Research, University of Glasgow, 464 Bearsden road, Glasgow G61 1QH, United Kingdom	OL741591, OL741592, OL741593, OL741594, OL741595, OL741596, OL741597, OL741598, OL741599, OL774840, OL774841, OL774842, OL774849, OL774850, OL774851	2021
Direct Submission	Rieu M., Ji S., Byun H., Han S., Choi C., Nam H., Seo S., Chae J.	Labaratory of Veterinary Internal Medicine, Seoul National University, 1 GwanakGwanak-ro, GwanakGwanak-gu, Seoul, Seoul 08840, Republic of Korea	PP334101, PP334102, PP334103, PP334104, PP334105, PP334106, PP334107, PP334108, PP334109, PP334110	2024
Molecular epidemiology and diagnostics of crimean-congo hemorrhagic fever in southern russia	Platonov A., Karan L., Shipulin G., Maleev V., Yazyshina S., Antonov V., Krasnova E., Govorukhina M., Karan L., Shipulin G., Yazyshina S., Shvager M., Obukhov I.	Central Research Institute of Epidemiology, Novogireevskaya Str. 3A, Moscow 111123, Russia, Unpublished	AF432115, AF432116, AF432117, AF432118, AF432119, AF432120, AF432121, AY062026, AY062027	2001
Partial sequence of cchf virus l segment	Meissner J., St. jeor S., Nichol S.	Microbiology, University of Nevada, Reno, 1664 North Virginia Street, Reno, NV 89557, USA, Unpublished	AY422208, AY422209	2003, 2004
Direct Submission	Sun S., Zhang Y., Dai X., Ma J., Zhang F., Meng W., Wang X., Feng C., Hang C., Zhu H., Azati A., Meng W., Wang X., Ajati A., Dai X., Ma J., Zhang F., Zhu H., Feng C., Hang C., Meng W., Wang X., Ajati A., Dai X., Ma J., Zhang F., Zhu H., Feng C., Hang C., Xie Y.	College of Life Science and Technology, Xinjiang University, 14 Shengli Road, Urumqi, Xinjiang 830046, China, Xinjiang Center for Disease Control and Prevention, College of Life Science and Technology, Xinjiang University, Urumqi, Xinjiang 830002, China	DQ217602, DQ227495, DQ227496	2005
Direct Submission	Zhang Y., Sun S., Meng W., Muhetar R., Wang X., Ma J., Zhang F., Hu J., Dai X., Feng C., Hang C., Azati R., Tai X.	Xinjiang Center for Disease Control and Prevention, Key Lab of Biological Resources and Genetic Engineering of Xinjiang, College of Life Science and Technology, Xinjiang University 830046, P.R. China	DQ301502, DQ301503, DQ301504, DQ301505	2005
Direct Submission	Rangunwala A., Burt F., Swanepoel R., Janusz P.	Medical Microbiology and Virology, University of the Free State, DF Malherbe Drive, Bloemfontein, Free State 9310, South Africa	KC880335	2013
Direct Submission	Chinikar S., Shah-hosseini N., Bouzari S., Jalali T., Shokrgozar M., Mostafavi E.	Arboviruses and Viral Haemorrhagic Fevers Laboratory (National Ref. Lab), Pasteur Institute of Iran, 69 Pasteur Ave, Tehran, Tehran 1316943551, Iran	KF796639	2013, 2014
Direct Submission	Bayrakdar F., Yagci caglayik D.	Virology, Public Health Institution of Turkey, Saglik Mahallesi Prof. Dr. Nusret Fisek Cad, Ankara, Sihhiye 06100, Turkey	KT266832, KT266833, KT266834, KT266835, KT266836, KT266837, KT266838, KT266839, KT266840, KT266841, KT266842, KT266843, KT266844, KT266845, KT266846, KT266847, KT266848	2015
Whole genome sequencing of crimean-congo hemorrhagic fever orthonairovirus in iran	Baniasadi V., Qaedi H., Jalali T., Pouriayevali M., Fazlalipour M., Mohammadi T., Fereydouni Z., Azadmanesh K., Salehi-vaziri M.	Arboviruses and Viral Hemorrhagic Fevers Department (National Ref Lab), Pasteur Institute of Iran, No 69, Pasteur Ave, Tehran, Tehran 1316943551, Iran, Unpublished	MH461097, MH461098, MH461099	2018
An iran-kerman22 related strain of crimean-congo hemorrhagic fever orthonairovirus, Crimean-ongo haemorrhagic fever among healthcare workers in iran 2000-2018, a report of national reference laboratory	Jalai T., Pouriayevali M., Mohammadi T., Fereydouni Z., Tavakolirad M., Khakifirouz S., Azadmanjiri S., Hosseini M., Ghalejoogh M., Azizizadeh S., Baniasadi V., Fazlalipour M., Jalali T., Mohammadi T., Fereydouni Z., Tavakoli M., Azad-manjiri S., Hosseini M., Ghalejoogh M., Khakifirouz S., Azizizadeh S., Baniasadi V., Fazlalipour M., Salehi-vaziri M.	Arboviruses and Viral Hemorrhagic Fevers Department (National Ref. Lab), Pasteur Institute of Iran, No. 69, Pasteur Ave., Tehran 1316943551, Iran, Arboviruses and Viral Hemorrhagic Fevers Department (National Ref. Lab.), Pasteur Institute of Iran, No. 69, Pasteur Ave., Tehran 1316943551, Iran, Unpublished	MH557793, MH697878, MH697879, MH697880, MH697881, MH697882, MH697883, MH697884, MH697885, MH697886, MH697887, MH697888	2018
Direct Submission	Ji J., Zhou H., Cui M., Guo M., Ma Z., Li L., Hu T., Shi W.	Key Laboratory of Etiology and Epidemiology of Emerging Infectious Diseases, Shandong First Medical University and Shandong Academy of Medical Sciences, Yingshengdonglu No. 2, Taian 271000, China	ON500500, ON500501, ON500502	2022
Direct Submission	Piorkowski G., Kiwan P., Masse S., Ayhan N., Charrel R., De lamballerie X., Falchi A.	UMR190 Unite des Virus Emergents U1207, IHU mediterranee, 19-21 boulevard Jean Moulin, Marseille 13005, France	PP025038, PP025039, PP025040	2023
Direct Submission	Karan L., Perekopskaya N., Morozkin E., Roev G.	Department of Molecular Diagnostic and Epidemiology, Central Research Institute of Epidemiology, Novogireevskaya 3A, Moscow 111123, Russia	PP116318, PP116319, PP116320	2024
Direct Submission	Baz-flores S., Herrero G., Cuadrado-matias R., Moraga fernandez A., Peralbo-moreno A., Fernandez de mera I., Ruiz-fons F.	Sanidad Animal, Instituto de Investigacion en Recursos Cinegeticos, Ronda de Toledo s/n, Ciudad Real, Ciudad Real 13003, Espana	PP449382, PP449383, PP449384, PP449385, PP449386	2024
Deposition of the nucleotide sequence of s, m, and l segments of cchf virus isolates derived from human blood serum of the patient in the south kazakhstan region, Deposition of the nucleotide sequences of s, m, and l segments of cchf virus obtained by sequencing of samples from ticks of the south kazakhstan region	Deryabin P., Nurmakhanov T., Atshabar B., Sansyzbaev Y., Berezin V., Yeskhojayev O., Vilkova A., Shevtsov A., Hewson R., Sansyzbaev Y., Atshabar B., Yeskhojayev O., Vilkova A., Shevtsov A., Hewson R., Atkinson B.	Research, Public Health England, Manor Farm Road, Salisbury, Wiltshire SP4 0JG, UK, Unpublished	KX096700, KX096701, KX096702, KX096703, KX096704, KX096705, KX096706, KX129730, KX129731, KX129732, KX129733, KX129734, KX129735, KX129736, KX129737, KX129738, KX129739, KX458183	2016
Direct Submission	Parker M., Glass P., Jennings G., Lofts R., Smith J., Miller M., Glass P., Jennings G., Lofts R., Smith J., Miller M., Spik K., Schoepp R.	Michael D. Parker, Virology Divison, USAMRIID, Bldg. 1425 Fort Detrick, Frederick, MD 21702, USA	U39455	1995, 2001
Genetic analysis of s gene of cchfv in humans in turkey	Ozdarendeli A., Aydin K., Tonbak S., Koksal I.	Virology, Firat University, Firat, Elazig 23119, Turkey, Unpublished	EF432639, EF432640, EF432641, EF432642, EF432643, EF432644, EF432645, EF432646, EF432647, EF432648, EF432649, EF432650, EF432651, EF432652, EF432653	2007
Genetic variation in the nucleoprotein gene of crimean-congo haemorrhagic fever virus	Marriott A., Berthet F., Nuttall P., Zeller H.	Marriott A.C., NERC Institute of Virology & Environmental Microbiology, Mansfield Road, Oxford, OX1 3SR, United Kingdom, Unpublished	U15020, U15021, U15022, U15023, U15024, U15089, U15090, U15091, U15092, U15093	1994
