# Supplementary material for: GenBank2PubMed: Bridging Viral Genomic Data and the Scientific Literature with AI-Assisted Curation
Source: Research Square preprint supplement (doi:10.21203/rs.3.rs-6710551/v1), 2025-05-30
Supplement: Supplementary file 2 [file Supplementary Table 2.xlsx]

## Sheet: Sheet1
Title	Authors	Journal	Accession	Year	AuthorSearch	GPT-4o web search	AutomatedSearch	PubMed Review	Publication
Sequence variability and geographic distribution of lassa virus in sierra leone	Leski T., Stockelman M., Moses L., Park M., Lin B.	Center for Bio/Molecular Science and Engineering, Naval Research Laboratory, 4555 Overlook Ave, Washington, DC 20375, USA, Unpublished	KM406518, KM406519, KM406520, KM406521, KM406522, KM406523, KM406524, KM406525, KM406526, KM406527, KM406528, KM406529, KM406530, KM406531, KM406532, KM406533, KM406534, KM406535, KM406536, KM406537, KM406538, KM406539, KM406540, KM406541, KM406542, KM406543, KM406544, KM406545, KM406546, KM406547, KM406548, KM406549, KM406550, KM406551, KM406552, KM406553, KM406554, KM406555, KM406556, KM406557,…	2014	✓	✓	✓	✓	25811712
Whole genome-sequencing from clinical and field samples uncovers ancient origins and intra-host evolution of lassa virus	Andersen K., Shapiro B., Matranga C., Gire S., Sealfon R., England E., Winnicki S., Moses L., Stremlau M., Folarin O., Odia I., Ehiane P., Goba A., Momoh M., Gnirke A., Birren B., Hensley L., Levin J., Happi C., Garry R., Sabeti P.	Broad Institute, 75 Ames St, Cambridge, MA 02142, USA, Unpublished	KM821772, KM821773, KM821774, KM821775, KM821776, KM821777, KM821778, KM821779, KM821780, KM821781, KM821782, KM821783, KM821784, KM821785, KM821786, KM821787, KM821788, KM821789, KM821790, KM821791, KM821792, KM821793, KM821794, KM821795, KM821796, KM821797, KM821798, KM821799, KM821800, KM821801, KM821802, KM821803, KM821804, KM821805, KM821806, KM821807, KM821808, KM821809, KM821810, KM821811,…	2014	✓	✓	✓	✓	26276630
Lassa virus outbreak genomics and epidemiology from nigeria	Odia I., Ehaine P., Oguzie J., Siddle K., Mehta S., Barnes K., Winnicki S., Brehio P., Shah R., Chak B., Yozwiak N., Amao A., Nosamiefan I., Birren B., Park D., Folarin O., Okokhere P., Sabeti P., Happi C.	Infectious Disease Program, Broad Institute of Harvard and MIT, 75 Ames St, Cambridge, MA 02142, USA, Unpublished	MH053463, MH053464, MH053465, MH053466, MH053467, MH053468, MH053469, MH053470, MH053471, MH053472, MH053473, MH053474, MH053475, MH053476, MH053477, MH053478, MH053479, MH053480, MH053481, MH053482, MH053483, MH053484, MH053485, MH053486, MH053487, MH053488, MH053489, MH053490, MH053491, MH053492, MH053493, MH053494, MH053495, MH053496, MH053497, MH053498, MH053499, MH053500, MH053501, MH053502,…	2018	✓	✓	✓	✓	30332564
Capturing diverse microbial sequence with comprehensive and scalable probe design	Metsky H., Siddle K., Gladden-young A., Qu J., Yang D., Brehio P., Goldfarb A., Piantadosi A., Wohl S., Carter A., Lin A., Barnes K., Tully D., Corleis B., Hennigan S., Barbosa-lima G., Vieira Y., Paul L., Tan A., Garcia K., Parham L., Odia I., Eromon P., Folarin O., Goba A., Simon-loriere E., Hensley L., Balmaseda A., Harris E., Kwon D., Allen T., Runstadler J., Smole S., Bozza F., Souza T., Ise…	Viral Genomics, IDMP, Broad Institute, 75 Ames Street, Cambridge, MA 02142, USA, Unpublished	MK281624, MK281625, MK281626, MK281627, MK281628, MK281629, MK281630, MK281631, MK291248, MK291249, MK291250, MK291251, MK291252, MK291253	2018	✓	✓	✓	✓	30718881
Lassa virus in pygmy mice, benin	Yadouleton A., Achaz A., Kourouma F., Saizounou R., Baptiste J., Gunther S., Fichet-calvet E.	Virology, Bernhard-Nocht Institute of Tropical Medicine, Bernhard-Nocht Strasse 74, Hamburg 20359, Germany, Unpublished	MH028396, MH028397, MH028398, MH028399, MH028400, MH028401	2018	✓	✓	✓	✓	31365854
Lethal infection of lassa virus isolated from a human clinical sample in outbred guinea pigs without adaptation	Maruyama J., Manning J., Mateer E., Sattler R., Bukreyeva N., Huang C., Paessler S.	Pthology, University of Texas Medical Branch, 301 university blvd, GALVESTON, TX 77555, USA, mSphere (2019) In press	MN275172, MN275173	2019	✓	✓	✓	✓	31554720
Lassa virus diversity in liberia	Welch S., Wiley M., Davis W., Patel K., Albarino C., Prieto K., Reyes D., Chitty J., Fakoli L., Bolay F., Stroher U., Palacios G.	Center for Genome Sciences, United States Army Medical Research Institute of Infectious Diseases (USAMRIID), 1425 Porter Street, Ft Detrick, MD 21702, USA, Viral Special Pathogens Branch, Centers for Disease Control and Prevention, 1600 Clifton Rd. NE, Atlanta, GA 30333, USA, Unpublished	MG812630, MG812631, MG812632, MG812633, MG812634, MG812635, MG812636, MG812637, MG812638, MG812639, MG812640, MG812641, MG812642, MG812643, MG812644, MG812645, MG812646, MG812647, MG812648, MG812649, MG812650, MG812651, MG812652, MG812653, MG812654, MG812655, MG812656, MG812657, MG812658, MG812659, MG812660, MG812661, MG812662, MG812663, MG812664, MG812665, MG812666, MG812667, MG812668, MG812669,…	2018	✓	✓	✓	✓	31588039
A sporadic and lethal lassa fever case in forest guinea, 2019	Magassouba N., N'faly magassouba N., Koivogui E., Conde S., Kone M., Koropogui M., Soropogui B., Kekoura I., Hinzmann J., Guenther S., Keita S., Duraffour S., Koropogui M., Soropogui B., Kekoura I., Hinzmann J., Guenther S., Keita S., Duraffour S., Fichet-calvet E., Fichet-calve E.	Virology dpt., Bernhard Nocht Institute for Tropical Medicine, Bernhard-Nocht-Str. 74, Hamburg 20359, Germany, Viruses 12 (10), 1062 (2020)	MT861993, MT861994	2020	✓	✓	✓	✓	32977629
Differential pathogenesis in closely related 2018 nigerian outbreak clade iii lassa virus isolates	Audet J., Stein D., Leung A., Warner B., Soule G., Sroga P., Griffin B., Grolla A., Tierney K., Albietz A., Kobasa D., Musa A., Ahmad A., Akinpelu A., Mba N., Qiu X., Ihekweazu C., Stein D., Safronetz D.	Special Pathogens, Public Health Agency of Canada, 1015 Arlington street, Winnipeg, Manitoba R3E 3R2, Canada, Unpublished	MZ169790, MZ169791, MZ169792, MZ169793, MZ169794, MZ169795, MZ169796, MZ169797, MZ169798, MZ169799	2021	✓	✓	✓	✓	34634087
Ecological investigations of the genomic diversity of lassa virus in sierra leone	Ghersi B., Vucak M., Nichols J., Bangura J., Bird B., Davison A.	Centre for Virus Research, University of Glasgow, 464 Bearsden Rd, Bearsden, Glasgow, GLC G61 1QH, United Kingdom, Unpublished	OM735968, OM735969, OM735970, OM735971, OM735972, OM735973, OM735974, OM735975, OM735976, OM735977, OM735978, OM735979, OM735980, OM735981, OM735982, OM735983, OM735984, OM735985, OM735986, OM735987, OM735988, OM735989, OM735990, OM735991, OM791219, OM791220, OM791221, OM791222, OM791225, OM791226, OM791227, OM791228, OM791229, OM791230, OM791231, OM791232	2022	✓	✓	✓	✓	36968239
Metagenomics identifies emerging and re-emerging viruses in nigerian cohorts with acute febrile illnesses, including pathogens of global concern	Oguzie J., Petros B., Oluniyi P., Mehta S., Eromon P., Adewale-fasoro O., Ifoga P., Odia I., Pastusiak A., Gbemisola O., Aiyepada J., Uyigue E., Edamhande A., Blessing O., Airende M., Nair P., Tomkins-tinch C., Qu J., Stenson L., Oyejide N., Ajayi N., Ojide K., Ogah O., Abejegah C., Adedosu N., Ayodeji O., Okogbenin S., Okokhere P., Folarin O., Komolafe I., Ihekweazu C., Frost S., Jackson E., Sid…	Biological Sciences, African Centre of Excellence for Genomics of Infectious Diseases(ACEGID), Redeemer's University, Akoda, Ede, Osun 23401, Nigeria, Biological Sciences, Redeemer's University, Akoda junction, Ede, Osun 23401, Nigeria, Unpublished	OQ791479, OQ791482, OQ791484, OQ791486, OQ791487, OQ791488, OQ791492, OQ791493, OQ791494, OQ791495, OQ791496, OQ791497, OQ791498, OQ791499, OQ791500, OQ791501, OQ791502, OQ791503, OQ791504, OQ791505, OQ791506, OQ791507, OQ791508, OQ791509, OQ791510, OR147788, OR147789, OR147790, OR147791, OR147792, OR147793	2023	✓	✓	✓	✓	37542071
Lassa virus infection of non-rodent hosts in nigeria	Happi A., Ogunsanya O., Ayinla A., Sijuwola A., Akano K., Saibu F., Nwofoke C., Achonduh-atijegbe O., Daodu R., Adedokun O., Adeyemo A., Parker Z., Parker E., Mccauley M., Eller L., Tiamiyu A., Iroezindu M., Akinwale E., Mebrahtu T., Lombardi K., Broach E., Prins P., Lay J., Amare M., Nosamiefan I., Okolie J., Modjarrad K., Collins N., Vasan S., Tucker C., Fouapon A., Sharon D., Ogunsanya O., Ayi…	African Center of Excellence for Genomics of Infectious Diseases, Redeemer's University, Redeemer's University, Ede, Osun PMB230, Nigeria, Unpublished	OR493499, OR493500, OR493501, OR493502, OR493503, OR493504	2023	✓	✓	✓	✓	38088796
The pathogenic factor of lassa virus infection in guinea pigs	Taniguchi S., Saito T., Paroha R., Manning J., Huang C., Paessler S., Maruyama J.	Pathology, The University of Texas Medical Branch, 301 university blvd, Galveston, TX 77555, USA, Unpublished	PP826286, PP826287, PP826288, PP826289	2024	✓	✓	✓	✓	38826374
A lassa virus live attenuated vaccine candidate that is safe and efficacious in guinea pigs	Carey B., Yu S., Geiger J., Ye C., Mehta M., Hirsch S., Cubitt B., Martinez-sobrido L., Carlos de la torre J., Kuhn J.	IRF, NIH/NIAID, 8200 Research Plaza, Frederick, MD 21702, USA, Unpublished	PQ421570, PQ421571	2024	✓	✓	✓	✓	39551823
Metagenomic sequencing at the epicenter of the nigeria 2018 lassa fever outbreak, Phylogeography of lassa virus in nigeria	Ehichioya D., Kafetzopoulou L., Lemey P., Rieger T., Cadar D., Ogbaini-emovon E., Okogbenin S., Asogun D., Pullan S., Lemey P., Suchard M., Pahlmann M., Thielebein A., Hinzmann J., Oestereich L., Wozniak D., Efthymiadis K., Schachten D., Koenig F., Matjeschk J., Lorenzen S., Lumley S., Ighodalo Y., Adomeh D., Olokor T., Omomoh E., Omiumu R., Agbukor J., Ebo B., Aiyepada J., Ebhodaghe P., Osiemi B…	Department of Virology, Bernhard-Nocht-Institute for Tropical Medicine, Bernhard-Nocht-Str. 74, Hamburg 20359, Germany, Unpublished	MK107842, MK107843, MK107844, MK107845, MK107846, MK107847, MK107848, MK107849, MK107850, MK107851, MK107852, MK107853, MK107854, MK107855, MK107856, MK107857, MK107858, MK107859, MK107860, MK107861, MK107862, MK107863, MK107864, MK107865, MK107866, MK107867, MK107868, MK107869, MK107870, MK107871, MK107872, MK107873, MK107874, MK107875, MK107876, MK107877, MK107878, MK107879, MK107880, MK107881,…	2018	✓	✓	✓	✓	30606844, 31413134
A case of imported lassa fever from mali	Atkin S., Hand J., Anaraki S., Gothard P., Walsh A., Gopal R., Gopal R., Morgan D., Brown D.	Virus Reference Department, HPA Centre for Infections, 61 Colindale Avenue, Colindale, London NW9 5HT, United Kingdom, Euro Surveill. (2009) In press	FJ824031	2009	✓	✓	✓		19317988
Direct Submission	Rieger T., Cadar D., Schmidt-chanasit J., Gunther S.	WHO Collaborating Centre for Arboviruses and Hemorrhagic Fever Reference and Research, Bernhard Nocht Institute for Tropical Medicine, Bernhard-Nocht-Str. 74, Hamburg 20359, Germany	KU961971, KU961972	2016	✓		✓	✓	29460758
Uncovering the etiology of fevers of unknown origin: a laboratory-based observational study in patients with suspected ebola, guinea, 2014	Postigo hidalgo I., Drexler J.	Institute of virology, Charite Universitatsmedizin Berlin, Chariteplatz 1, Berlin, Berlin 10117, Germany, Unpublished	OQ889555	2023	✓	✓	✓	✓	39928049
Recent detection of lassa and crimean-congo haemorrhagic fever virus infections in the capital of mali, bamako	Baumann J., Mandy K.	Bundeswehr Institute of Microbiology, Neuherbergstr. 11, Munich, Bavaria 80937, Germany, Unpublished	MH473586, MH473587	2018		✓	✓	✓	31002054
Direct Submission	Hain T.	Institute for Medical Microbiology, NGS core facility, Justus-Liebig-University, Institute for Medical Microbiology, Schuberttrasse 81, 35392 Giessen, Hessia, 35392, Germany	LT601601, LT601602	2016		✓	✓	✓	27660771, 29460758
Lassa virus in host rodent mastomys natalensis within urban area n'zerekore, guinea	Karan L., Makenov M., Korneev M., Boumbaly S., Kourouma K., Bayandin R., Gladysheva A., Shipovalov A., Boiro M., Sako S.	Department of Molecular diagnostic and Epidemiology, Central Research Institute of Epidemiology, Novogireevskaya Str, 3A, Moscow 111123, Russia, Unpublished	MH732623, MH732624, MH732625, MH732626, MH732627, MH732628, MH732629, MH732630, MH732631, MH732632, MH732633, MH732634, MH732635, MH732636, MH732637, MH732638, MH732639, MH732640	2018		✓	✓		https://www.biorxiv.org/content/10.1101/616466v1.full
Geographical dependence of genetic variability among lassa virus isolates	Clegg C., Tolley H., Burton J., Silman N., Lloyd G., Clegg C.	Clegg C.S., Special Pathogens Programme, Centre for Applied Microbiology and Research, Porton Down, Salisbury, SP4 0JG, UNITED KINGDOM, Unpublished	AJ310764	2001
Direct Submission	Hajjaj A., Jahrling P., Chain P., Do L., Smith K., Imbro P., Geisbert J., Malfatti S., Ibrahim M.	Viral Genomics Group, USAMRIID, Fort Detrick, MD 21702, USA, Viral Sequencing Group, Lawrence Livermore National Laboratory, 7000 East Avenue, Livermore, CA 94550, USA	AY628200, AY628201, AY628202, AY628203, AY628204, AY628205, AY628206, AY628207, AY628208	2004
Direct Submission	Bjornson-hooper Z., Gire S., Honko A., Sabeti P., Hensley L.	Virology, United States Army Medical Research Institute for Infectious Diseases, 1425 Porter St, Frederick, MD 21702, USA	JN650517, JN650518	2011
Arenaviruses in southern african rodents	Jardine J., Burt F., Grobbelaar A., Swanepoel R.	Centre for Zoonotic and Emerging Diseases (Special Viral Pathogens Laboratory), NICD, 1 Modderfontein Road, Johannesburg, Gauteng 2131, South Africa, Unpublished	KF926390	2013
A case of lassa fever virus outbreak in ebonyi and lagos states, nigeria. 2013, A case of lassa fever virus outbreak in enugu state, nigeria	Omilabu S., Orenolu M., James A.	Department of Biochemistry/Virology Unit- Central Research Lab, College of Medicine-University of Lagos, Block F, Idi-araba, Surulere, Lagos State 234-100254, Nigeria, Unpublished	KJ944259, KJ944260, KJ944261	2014
Direct Submission	Rossi S., Guerbois M., Forrester N., Ksiazek T., Lin D., Hari K., Weaver S.	Microbiology and Immunology, University of Texas Medical Branch, 301 University Boulevard, Galveston, TX 77555, USA	KU978807, KU978808, KU978809, KU978810, KU978811, KU978812	2016
Nucleotide sequence variability of gpc region of lassa fever virus in 2015/2016 outbreak in nigeria	Omilabu S., Salu O., James A.	Department of Biochemistry/Virology Unit- Central Research Lab., College of Medicine-University of Lagos, Block F, Idi-araba, Surulere, Lagos State 234-100254, Nigeria, Unpublished	MF317932, MF317933, MF317934, MF317935, MF317936, MF317937, MF317938, MF317939, MF317940, MF317941, MF317942, MF317943, MF317944, MF317945, MF317946	2017
Lassa virus from cote d'ivoire: insights into the cryptic circulation of lasv in west africa	Escalera-zamudio M., Kouadio L., Matranga C., Du plessis L., Theze J., Pybus O., Calvignac-spencer S., Leendertz F.	Zoology, The University of Oxford, S Parks Rd, Oxford, Oxfordshire OX1 3SY, United Kingdom, Unpublished	MK656390, MK656391, MK656392, MK656393, MK656394, MK656395, MK656396, MK656397, MK656398, MK656399, MK656400, MK656401, MK656402, MK656403, MK656404, MK656405, MK656406, MK656407, MK656408, MK656409, MK656410, MK656411, MK656412, MK656413, MK656414, MK656415, MK656416, MK656417, MK656418, MK656419, MK656420, MK656421, MK656422, MK656423, MK656424, MK656425, MK656426, MK656427, MK656428, MK656429,…	2019
Direct Submission	NCBI	One Health Institute & Karen C Drayer Wildlife Health Center, School of Veterinary Medicine, University of California, Davis, 1089 Veterinary Medicine Drive, Davis, CA 95616, USA	MW007351, MW007352, MW007353, MW007354, MW007355	2020
Direct Submission	Ashraf S., Love H., Burton C., Carmichael S., Davis C., Filipe A., Roddy S., Smollett K., Summers S., Tong L., Richards K., Thomson E.	MRC Centre for Virus Research, University of Glasgow, 464 Bearsden road, Glasgow G61 1QH, United Kingdom	OL774856, OL774857, OL774858, OL774859, OL774860, OL774861, OL774862, OL774863	2021
Zoonotic surveillance of lassa fever virus in nigeria	Eromon P., Ogunsanya O., Oluniyi P., Olumade T., Oguzie J., Happi A., Happi C.	Biological Sciences, Redeemer's University, Akoda, Ede, Osun 234001, Nigeria, Unpublished	ON569369, ON569371, ON569373, ON569375, ON569377, ON569379	2022
Genomic characterization of clinical lassa virus isolates from 2017-2023 transmission seasons in sierra leone	Sandi J., Momoh M., Jalloh A., Kamara M., Kallon T., Baimba F., Samuels R., Wohl S., Alhasan F., Kanneh L., Park D., Siddle K., Schefflien J., Sabeti P., Garry R., Andersen K., Happi C., Momoh M., Jalloh A., Kamara M., Kallon T., Baimba F., Samuels R., Wohl S., Alhasan F., Kanneh L., Park D., Siddle K., Schieffelin J., Sabeti P., Garry R., Andersen K., Happi C., Momoh M., Jalloh A., Kamara M., Ka…	Kenema Government Hospital, Viral Hemorrhagic Fever (Vhf) Laborarory, Combema Road, Kenema, Eastern Regon, Sierra Leone, Laboratory, Kenema Government Hospital, viral hemorrhagic fever (VHF) Laborarory, Combema road, Kenema, Eastern Province, Sierra Leone, Viral Hemorrhagic Fever (VHF) Laborarory, Kenema Government Hospital, Combema Road, Kenema, Sierra Leone, Unpublished	OQ919498, OQ919499, OQ919500, OQ919501, OQ919502, OQ919503, OQ919504, OQ919505, OQ919506, OQ919507, OQ919508, OQ919509, OQ919510, OQ919511, OQ919512, OQ919513, OQ919514, OQ919515, OQ919516, OQ919517, OQ919518, OQ919519, OQ919520, OR041676, OR041677, OR041678, OR041679, OR041680, OR041681, OR041682, OR041683, OR041684, OR041685, OR041686, OR041687, OR113004, OR113005, OR113006, OR113007, OR113008	2023
Direct Submission	Happi A., Ogunsanya O., Sijuwola A., Saibu F., Akano K., Ayinla A., Nwofoke C., Daodu R., Adedokun O., Fadele J., Elias O., Ogundana K., Lawal O., Adelabu A., Nosamiefan I., Okolie J., Parker Z., Mccauley M., Lombardi K., Eller L., Broach E., Prins P., Parker E., Page B., Heeney J., Modjarrad K., Collins N., Vasan S., Happi C.	ACEGID, Redeemers University, Ede, Osun PMB230, Nigeria	PP431155, PP431156, PP431160, PP431162, PP431165, PP431167, PP431173, PP431176, PP431181, PP431183, PP431185, PP431187, PP431194, PP431195, PP431196, PP431198, PP431200, PP431203, PP431204, PP431205, PP431208, PP431209, PP431211	2024
