# Supplementary material for: GenBank2PubMed: Bridging Viral Genomic Data and the Scientific Literature with AI-Assisted Curation
Source: Research Square preprint supplement (doi:10.21203/rs.3.rs-6710551/v1), 2025-05-30
Supplement: Supplementary file 3 [file Supplementary Table 3.xlsx]

## Sheet: Sheet1
Title	Authors	Journal	Accession	Year	AuthorSearch	GPT-4o web search	AutomatedSearch	PubMed Review	Publication
Characterization of nipah virus from naturally infected pteropus vampyrus bats, malaysia	Chang L., Rahman S., Hassan S., Olival K., Mohamed M., Hassan L., Saad N., Shohaimi S., Mamat Z., Naim M., Epstein J., Suri A., Field H., Daszak P., Henipavirus ecology research G.	Chang L.Y., Medical Microbiology, University Malaya, Faculty of Medicine, 50603, MALAYSIA, Emerg. Infect. Dis. 16 (12), 1990-1993 (2010)	FN869553	2010	✓	✓	✓	✓	21122240
Nipah virus in the fruit bat pteropus vampyrus in sumatera, indonesia	Sendow I., Ratnawati A., Taylor T., Abdul adjid R., Saepulloh M., Barr J., Daniels P., Field H.	Department of Agriculture, Fisheries & Forestry, Queensland Centre for Emerging Infectious Diseases, Biosecurity Queensland, Block 10, 39 Kessels Road, Coopers Plains, QLD 4108, Australia, Unpublished	KC903168, KC903169, KC903170, KC903171, KC903172	2013	✓	✓	✓	✓	23894501
Inference of nipah virus evolution, 1999-2015	Whitmer S., Lo M., Sazzad H., Zufan S., Gurley E., Sultana S., Amman B., Ladner J., Rahman M., Doan S., Satter S., Flora M., Montgomery J., Nichol S., Spiropoulou C., Lo M., Zufan S., Nichol S., Spiropoulou C., Klena J.	Viral Special Pathogens, Centers for Disease Control and Prevention, 1600 Clifton Rd, Atlanta, GA 30324, USA, Virus Evol 7 (1), veaa062 (2021)	MK673558, MK673559, MK673560, MK673561, MK673562, MK673563, MK673564, MK673565, MK673566, MK673567, MK673568, MK673570, MK673571, MK673572, MK673573, MK673574, MK673575, MK673576, MK673577, MK673578, MK673579, MK673580, MK673581, MK673582, MK673583, MK673584, MK673585, MK673586, MK673587, MK673588, MK673589, MK673590, MK673591, MK673592	2019, 2021	✓	✓	✓	✓	34422315
The genetic diversity of nipah virus across spatial scales	Azuero O., Ou T., Lefrancq N., Nikolay B., Mckee C., Cappelle J., Hul V., Hoem T., Lemey P., Rahman M., Islam A., Gurley E., Hul V., Hoem T., Heng O., Williams D., Cappelle J., Salje H., Duong V.	Virology Unit, Institut Pasteur du Cambodge, 5, Bld Monivong, Phnom Penh, Phnom Penh, Phnom Penh 120210, Cambodia, Unpublished	OR762512, OR762513, OR762514, OR762515, OR762516, OR762517, OR762518, OR762519, OR762520, OR762521, OR762522, OR762523, OR762524, OR762525, OR762526, OR762527, OR762528, OR762529, OR762530, OR762531, OR762532, OR762533, OR762534, OR762535, OR762536, OR762537	2023	✓	✓	✓	✓	38682164
Complete genome sequence of nipah virus from patient sample of kerala outbreak 2018, The genome sequence of nipah virus from patient sample of kerala outbreak 2018, Transcriptional analysis of nipah viral mrna reveals differential expression of the p gene	Yadav P.	Maximum Containment Laboratory, National Institue of Virology, Pashan, Pune, Maharashtra 411021, India, Maximum Containment Laboratory, National Institute of Virology, Pashan, Pune, Maharashtra 411021, India, Emerging Infect. Dis. (2019) In press, Unpublished	MH396625, MH423323, MH423324, MH523640, MH523641, MH523643, MH523644, MH523645, MK577980, MK577981, MK577982, MK577983, MK577984, MK577985, MK577986, MK577987, MK577988, MK577989, MN549402, MN549403, MN549404, MN549405, MN549406, MN549407, MN549408, MN549409, MN549410, MN549411	2018, 2019		✓	✓	✓	31002049
Survey for nipah virus infection among bats in thailand	Wacharapluesadee S., Lumlertdacha B., Boongird K., Wanghongsa S., Chanhome L., Rollin P., Stockton P., Rupprecht C., Ksiazek T., Hemachudha T.	Medicine, Chulalongkorn University Hospital, Rama 4, Bangkok 10330, Thailand, Unpublished	DQ061851, DQ061852, DQ061853, DQ061854, DQ061855, DQ061856, DQ061857, DQ061858	2005, 2009		✓	✓		https://sciendo.com/article/10.5372/1905-7415.0706.244
Genetic characterization of nipah virus in pteropus lylei, thailand	Wacharapluesadee S., Ngamprasertwong T., Supavonwong P., Phumesin P., Ratanasetyuth N., Boongird K., Wanghongsa S., Supavonwong P., Phumesin P., Ratanasetyuth N., Boongird K., Wanghongsa S., Hemachudha T.	Medicine, Chulalongkorn University Hospital, Rama 4, Bangkok 10330, Thailand, Unpublished	FJ648075, FJ648076, FJ648077, FJ648078, FJ648079, FJ648080, FJ648081, FJ648082	2009		✓	✓		https://sciendo.com/article/10.5372/1905-7415.0706.244
Genetic characterisation of a nipah virus isolated from a pteropus vampyrus in malaysia	Sharifah S., Sohayati A., Maizan M., Chang L., Sharina M., Syamsiah A., Latiffah K., Siti suri A., Zaini C., Humes F., Daszak P., Epstein J.	School of Medicine and Health Sciences, Monash University, Sunway Campus, Jalan Persiaran Lagoon Selatan, Kuala Lumpur, Selangor 46150, Malaysia, Unpublished	HM545086, HM545087, HM545088	2010		✓	✓		https://www.neurology-asia.org/articles/20091_067.pdf
First report of nipah virus shed in urine by fruit bats (pteropus medius), sri lanka	Kohl C., Siriwardana S., Muzeniek T., Perera T., Bas D., Oeruc M., Brinkmann A., Becker-ziaja B., Schwarz F., Jeevatharan H., Weerasena J., Handunnetti S., Perera I., Premawansa G., Premawansa S., Yapa W., Nitsche A.	Centre for Biological Threats and Special Pathogens, Robert Koch-Institute, Seestrasse 10, Berlin 13353, Germany, Unpublished	PP893186, PP893187, PP893188, PP893189	2024		✓	✓		https://www.biorxiv.org/content/10.1101/2024.07.31.605971v1
Nipah virus transmission in bangladesh	Rahman M., Miah M., Hossain M., Satter S., Klena J., Shirin T., Montgomery J., Rahman D., Rahman S., Miah M., Rahman S., Rahman D., Hossain M., Satter S., Klena J., Shirin T., Montgomery J., Rahman M.	One Health Laboratory, Icddr, B, 68, Shaheed Tajuddin Ahmed Sharani, Dhaka 1212, Bangladesh, One Health Laboratory, icddr, b, 68, Shaheed Tajuddin Ahmed sharani, Dhaka 1212, Bangladesh, Unpublished	PP981664, PP981665, PP981666, PP981667, PP981668, PP981669, PP981670, PP981671, PP981672, PP981673, PP981674, PP981675, PP981676, PP981677, PP981678, PP981679, PP981680, PP981681, PP981682, PP981683, PP981684, PQ368168, PQ368169, PQ368170	2024
Detection of different strains of nipah virus through ecologically targeted surveillance of pteropid bats, cambodia	Duong V., Cappelle J., Hul V., Buchy P.	Virology, Institut Pasteur in Cambodia, 5, Monivong Blvd, Phnom Penh 12201, Cambodia, Unpublished	KM034753, KM034754, KM034755	2014
Direct Submission	NCBI	One Health Institute & Karen C Drayer Wildlife Health Center, School of Veterinary Medicine, University of California, Davis, 1089 Veterinary Medicine Drive, Davis, CA 95616, USA	MT125112, MT125113, MT125114, MT125115, MT125116, MT125117	2020
