# Supplementary material for: GenBank2PubMed: Bridging Viral Genomic Data and the Scientific Literature with AI-Assisted Curation
Source: Research Square preprint supplement (doi:10.21203/rs.3.rs-6710551/v1), 2025-05-30
Supplement: Supplementary file 4 [file Supplementary Table 4.xlsx]

## Sheet: Sheet1
Title	Authors	Year	Journal	PMID
Geographical distribution and surveillance of Crimean-Congo hemorrhagic fever in Iran.	Chinikar S; Ghiasi SM; Moradi M; Goya MM; Shirzadi MR; Zeinali M; Meshkat M; Bouloy M	2010	Vector Borne Zoonotic Dis	20854025
The high genetic variation of viruses of the genus Nairovirus reflects the diversity of their predominant tick hosts.	Honig JE; Osborne JC; Nichol ST	2004	Virology	14972529
Ecology of the Crimean-Congo hemorrhagic fever endemic area in Albania.	Papa A; Velo E; Papadimitriou E; Cahani G; Kota M; Bino S	2009	Vector Borne Zoonotic Dis	19402760
The complete genome analysis of Crimean-Congo hemorrhagic fever virus isolated in Turkey.	Ozdarendeli A; Canakoğlu N; Berber E; Aydin K; Tonbak S; Ertek M; Buzgan T; Bolat Y; Aktaş M; Kalkan A	2010	Virus Res	19941917
Phylogenetic analysis in a recent controlled outbreak of Crimean-Congo haemorrhagic fever in the south of Iran, December 2008.	Chinikar S; Ghiasi SM; Moradi M; Goya MM; Reza Shirzadi M; Zeinali M; Mostafavi E; Pourahmad M; Haeri A	2010	Euro Surveill	21144440
Serological evaluation of Crimean-Congo hemorrhagic fever in humans with high-risk professions living in enzootic regions of Isfahan province of Iran and genetic analysis of circulating strains.	Chinikar S; Ghiasi SM; Naddaf S; Piazak N; Moradi M; Razavi MR; Afzali N; Haeri A; Mostafavizadeh K; Ataei B; Khalilifard-Brojeni M; Husseini SM; Bouloy M	2012	Vector Borne Zoonotic Dis	22217167
Crimean-Congo hemorrhagic fever virus in ticks, Southwestern Europe, 2010.	Estrada-Peña A; Palomar AM; Santibáñez P; Sánchez N; Habela MA; Portillo A; Romero L; Oteo JA	2012	Emerg Infect Dis	22261502
Migratory birds, ticks, and crimean-congo hemorrhagic fever virus.	Lindeborg M; Barboutis C; Ehrenborg C; Fransson T; Jaenson TG; Lindgren PE; Lundkvist A; Nyström F; Salaneck E; Waldenström J; Olsen B	2012	Emerg Infect Dis	23171591
Crimean-Congo hemorrhagic fever Asia-2 genotype, Pakistan.	Alam MM; Khurshid A; Sharif S; Shaukat S; Suleman RM; Angez M; Zaidi SS	2013	Emerg Infect Dis	23735999
Mini-genome rescue of Crimean-Congo hemorrhagic fever virus and research into the evolutionary patterns of its untranslated regions.	Zhao J; Xia H; Zhang Y; Yin S; Zhang Z; Tang S; Kou Z; Yu J; Fan Z; Li T	2013	Virus Res	23891575
Molecular and serological findings in suspected patients with Crimean-Congo hemorrhagic fever virus in Iran.	Karlberg H; Sharifi-Mood B; Mousavi-Jazi M; Dilcher M; Lindegren G; Mardani M; Bereskly S; Weidmann M; Mirazimi A	2015	J Med Virol	25649667
CCHF virus variants in Pakistan and Afghanistan: Emerging diversity and epidemiology.	Khurshid A; Hassan M; Alam MM; Aamir UB; Rehman L; Sharif S; Shaukat S; Rana MS; Angez M; Zaidi SS	2015	J Clin Virol	25959153
Molecular detection of Crimean-Congo haemorrhagic fever virus in ticks collected from infested livestock populations in a New Endemic Area, South of Iran.	Farhadpour F; Telmadarraiy Z; Chinikar S; Akbarzadeh K; Moemenbellah-Fard MD; Faghihi F; Fakoorziba MR; Jalali T; Mostafavi E; Shahhosseini N; Mohammadian M	2016	Trop Med Int Health	26758985
Ribavirin Had Demonstrable Effects on the Crimean-Congo Hemorrhagic Fever Virus (CCHFV) Population and Load in a Patient With CCHF Infection.	Espy N; Pérez-Sautu U; Ramírez de Arellano E; Negredo A; Wiley MR; Bavari S; Díaz Menendez M; Sánchez-Seco MP; Palacios G	2018	J Infect Dis	29584885
Genotypic analysis of S segment of Crimean-Congo hemorrhagic fever virus in Turkey.	Say Coskun US; Asık Z	2019	Acta Microbiol Immunol Hung	30203691
Crimean-Congo Hemorrhagic Fever Virus, Mongolia, 2013-2014.	Voorhees MA; Padilla SL; Jamsransuren D; Koehler JW; Delp KL; Adiyadorj D; Baasandagwa U; Jigjav B; Olschner SP; Minogue TD; Schoepp RJ	2018	Emerg Infect Dis	30457521
Crimean-Congo haemorrhagic fever virus in ticks collected from livestock in Balochistan, Pakistan.	Kasi KK; von Arnim F; Schulz A; Rehman A; Chudhary A; Oneeb M; Sas MA; Jamil T; Maksimov P; Sauter-Louis C; Conraths FJ; Groschup MH	2020	Transbound Emerg Dis	31961043
Dual RNA-Seq characterization of host and pathogen gene expression in liver cells infected with Crimean-Congo Hemorrhagic Fever Virus.	Kozak RA; Fraser RS; Biondi MJ; Majer A; Medina SJ; Griffin BD; Kobasa D; Stapleton PJ; Urfano C; Babuadze G; Antonation K; Fernando L; Booth S; Lillie BN; Kobinger GP	2020	PLoS Negl Trop Dis	32251473
Detection of Crimean Congo haemorrhagic fever virus in North-eastern Senegal, Bokidiawé 2019.	Dieng I; Barry MA; Diagne MM; Diop B; Ndiaye M; Faye M; Ndione MHD; Dieng MM; Bousso A; Fall G; Loucoubar C; Sall AA; Faye O	2020	Emerg Microbes Infect	33161829
Identification of a novel lineage of Crimean-Congo haemorrhagic fever virus in dromedary camels, United Arab Emirates.	Khalafalla AI; Li Y; Uehara A; Hussein NA; Zhang J; Tao Y; Bergeron E; Ibrahim IH; Al Hosani MA; Yusof MF; Alhammadi ZM; Alyammahi SM; Gasim EF; Ishag HZA; Hosani FAL; Gerber SI; Almuhairi SS; Tong S	2021	J Gen Virol	33231536
Utility of a Sequence-Independent, Single-Primer-Amplification (SISPA) and Nanopore Sequencing Approach for Detection and Characterization of Tick-Borne Viral Pathogens.	Brinkmann A; Uddin S; Krause E; Surtees R; Dinçer E; Kar S; Hacıoğlu S; Özkul A; Ergünay K; Nitsche A	2021	Viruses	33572847
New circulation of genotype V of Crimean-Congo haemorrhagic fever virus in humans from Spain.	Monsalve Arteaga L; Muñoz Bellido JL; Negredo AI; García Criado J; Vieira Lista MC; Sánchez Serrano JÁ; Vicente Santiago MB; López Bernús A; de Ory Manchón F; Sánchez Seco MP; Leralta N; Alonso Sardón M; Muro A; Belhassen-García M	2021	PLoS Negl Trop Dis	33617538
Detection of Crimean-Congo hemorrhagic fever virus in blood-fed Hyalomma ticks collected from Mauritanian livestock.	Schulz A; Barry Y; Stoek F; Pickin MJ; Ba A; Chitimia-Dobler L; Haki ML; Doumbia BA; Eisenbarth A; Diambar A; Bah MY; Eiden M; Groschup MH	2021	Parasit Vectors	34187526
Transcriptome dataset of six human pathogen RNA viruses generated by nanopore sequencing.	Prazsák I; Csabai Z; Torma G; Papp H; Földes F; Kemenesi G; Jakab F; Gulyás G; Fülöp Á; Megyeri K; Dénes B; Boldogkői Z; Tombácz D	2022	Data Brief	35789906
Risk factors for Crimean-Congo Haemorrhagic Fever (CCHF) virus exposure in farming communities in Uganda.	Atim SA; Ashraf S; Belij-Rammerstorfer S; Ademun AR; Vudriko P; Nakayiki T; Niebel M; Shepherd J; Balinandi S; Nakanjako G; Abaasa A; Johnson PCD; Odongo S; Esau M; Bahati M; Kaleebu P; Lutwama JJ; Masembe C; Lambe T; Thomson EC; Tweyongyere R	2022	J Infect	36108783
Multiple genotypes of Crimean-Congo hemorrhagic fever virus detected in ticks during a one health survey in Agnam, Northeastern Senegal.	Mhamadi M; Badji A; Dieng I; Gaye A; Ndiaye EH; Ndiaye M; Toure CT; Barry A; Ndiaye O; Faye B; Ba FA; Diop B; Sagne SN; Fall G; Loucoubar C; Bovendo HF; Sall AA; Kobinger G; Faye O; Diallo M	2022	Emerg Microbes Infect	36268900
Whole-Genome Sequencing of Six Neglected Arboviruses Circulating in Africa Using Sequence-Independent Single Primer Amplification (SISPA) and MinION Nanopore Technologies.	Schulz A; Sadeghi B; Stoek F; King J; Fischer K; Pohlmann A; Eiden M; Groschup MH	2022	Pathogens	36558837
Prevalence of Crimean-Congo haemorrhagic fever in livestock following a confirmed human case in Lyantonde district, Uganda.	Atim SA; Niebel M; Ashraf S; Vudriko P; Odongo S; Balinandi S; Aber P; Bameka R; Ademun AR; Masembe C; Tweyongyere R; Thomson EC	2023	Parasit Vectors	36611216
Investigating the effect of ribavirin treatment on genetic mutations in Crimean-Congo haemorrhagic fever virus (CCHFV) through next-generation sequencing.	D'Addiego J; Elaldi N; Wand N; Osman K; Bagci BK; Kennedy E; Pektas AN; Hart E; Slack G; Hewson R	2023	J Med Virol	36734067
Epidemiological and Molecular Study on Tick-Borne Pathogens in Argun Port Area Near the Chinese-Russian Border.	Shi Q; Song FL; Yang Y; Gao YF; Ci Y; Cheng XL; Nie C; Liu LJ; Zhang XL; Wang J	2023	Vector Borne Zoonotic Dis	37695821
Emergence of Crimean-Congo Hemorrhagic Fever Virus in Eastern Senegal in 2022.	Sene O; Sagne SN; Ngom D; Diagne MM; Badji A; Khoulé A; Ndiaye EH; Sankhe S; Loucoubar C; Diallo M; Weidmann M; Dia N; Simon-Lorière E; Sall Y; Diop B; Ndiaye M; Sakuntabhai A; Sall AA; Faye O; Diallo D; Barry MA; Fall G	2024	Viruses	38400090
Genomic characterization of Volzhskoe tick virus (Bunyaviricetes) from a Hyalomma marginatum tick, Hungary.	Földvári G; Tauber Z; Tóth GE; Cadar D; Bialonski A; Horváth B; Szabó É; Lanszki Z; Zana B; Varga Z; Földes F; Kemenesi G	2024	Sci Rep	39147851
[Genetic characterization of the Sakhalin virus (SAKV), Paramushir virus (PMRV) (Sakhalin group, Nairovirus, Bunyaviridae), and Rukutama virus (RUKV) (Uukuniemi group, Phlebovirus, Bunyaviridae) isolated from the obligate parasites of the colonial sea-bir	L'vov DK; Al'khovskiĭ SV; Shchelkanov MIu; Shchetinin AM; Deriabin PG; Aristova VA; Gitel'man AK; Samokhvalov EI; Botikov AG	2014	Vopr Virusol	25335413
[Sequencing and comparative analysis of the complete glycoprotein gene of three Crimean-Congo hemorrhagic fever virus Chinese isolates].	Ma B; Hang C; Papa A	2001	Zhonghua Shi Yan He Lin Chuang Bing Du Xue Za Zhi	11436635
[Study on the molecular biology of hemorrhagic fever virus in Xinjiang].	Tang Q; Gao D; Zhao X; Han L; Hang C	2002	Zhonghua Liu Xing Bing Xue Za Zhi	12667358
[Geography and host distribution of Crimean-Congo hemorrhagic fever in the Tarim Basin].	Dai X; Muhtar; Feng CH; Sun SR; Tai XP; Wang XH; Burenmind; Meng WW; Azat; Zhang YJ	2006	Zhonghua Liu Xing Bing Xue Za Zhi	17415983
