# Supplementary material for: GenBank2PubMed: Bridging Viral Genomic Data and the Scientific Literature with AI-Assisted Curation
Source: Research Square preprint supplement (doi:10.21203/rs.3.rs-6710551/v1), 2025-05-30
Supplement: Supplementary file 5 [file Supplementary Table 5.xlsx]

## Sheet: Sheet1
Title	Authors	Year	Journal	PMID
Imported Lassa fever, Pennsylvania, USA, 2010.	Amorosa V; MacNeil A; McConnell R; Patel A; Dillon KE; Hamilton K; Erickson BR; Campbell S; Knust B; Cannon D; Miller D; Manning C; Rollin PE; Nichol ST	2010	Emerg Infect Dis	20875288
Lassa hemorrhagic fever in a late term pregnancy from northern Sierra Leone with a positive maternal outcome: case report.	Branco LM; Boisen ML; Andersen KG; Grove JN; Moses LM; Muncy IJ; Henderson LA; Schieffellin JS; Robinson JE; Bangura JJ; Grant DS; Raabe VN; Fonnie M; Zaitsev EM; Sabeti PC; Garry RF	2011	Virol J	21843352
The impact of human conflict on the genetics of Mastomys natalensis and Lassa virus in West Africa.	Lalis A; Leblois R; Lecompte E; Denys C; Ter Meulen J; Wirth T	2012	PLoS One	22615894
Molecular confirmation of Lassa fever imported into Ghana.	Bonney JHK; Nyarko EO; Ohene SA; Amankwa J; Ametepi RK; Nimo-Paintsil SC; Sarkodie B; Agbenohevi P; Adjabeng M; Kyei NNA; Bel-Nono S; Ampofo WK	2016	Afr J Lab Med	28879105
The S Genome Segment Is Sufficient to Maintain Pathogenicity in Intra-Clade Lassa Virus Reassortants in a Guinea Pig Model.	Welch SR; Scholte FEM; Albariño CG; Kainulainen MH; Coleman-McCray JD; Guerrero LW; Chakrabarti AK; Klena JD; Nichol ST; Spengler JR; Spiropoulou CF	2018	Front Cell Infect Microbiol	30050872
Molecular confirmation and phylogeny of Lassa fever virus in Benin Republic 2014-2016.	Salu OB; James AB; Bankolé HS; Agbla JM; Da Silva M; Gbaguidi F; Loko CF; Omilabu SA	2019	Afr J Lab Med	31534915
An Outbred Guinea Pig Disease Model for Lassa Fever Using a Host-Adapted Clade III Nigerian Lassa Virus.	Deschambault Y; Soule G; Klassen L; Sloan A; Audet J; Azaransky K; Musa AS; Ahmad A; Akinpelu AM; Mba N; Stein DR; Ranson M; Almiski M; Tierney K; Fischer G; Chan M; Safronetz D	2023	Viruses	36992478
Cryo-EM structures of Lassa and Machupo virus polymerases complexed with cognate regulatory Z proteins identify targets for antivirals.	Xu X; Peng R; Peng Q; Wang M; Xu Y; Liu S; Tian X; Deng H; Tong Y; Hu X; Zhong J; Wang P; Qi J; Gao GF; Shi Y	2021	Nat Microbiol	34127846
Conformational changes in Lassa virus L protein associated with promoter binding and RNA synthesis activity.	Kouba T; Vogel D; Thorkelsson SR; Quemin ERJ; Williams HM; Milewski M; Busch C; Günther S; Grünewald K; Rosenthal M; Cusack S	2021	Nat Commun	34857749
