# Supplementary material for: GenBank2PubMed: Bridging Viral Genomic Data and the Scientific Literature with AI-Assisted Curation
Source: Research Square preprint supplement (doi:10.21203/rs.3.rs-6710551/v1), 2025-05-30
Supplement: Supplementary file 6 [file Supplementary Table 6.xlsx]

## Sheet: Sheet1
Title	Authors	Year	Journal	PMID
Isolation of Nipah virus from Malaysian Island flying-foxes.	Chua KB; Koh CL; Hooi PS; Wee KF; Khong JH; Chua BH; Chan YP; Lim ME; Lam SK	2002	Microbes Infect	11880045
Nipah virus-associated encephalitis outbreak, Siliguri, India.	Chadha MS; Comer JA; Lowe L; Rota PA; Rollin PE; Bellini WJ; Ksiazek TG; Mishra A	2006	Emerg Infect Dis	16494748
Circulation of Nipah virus in Pteropus giganteus bats in northeast region of India, 2015.	Yadav P; Sudeep A; Gokhale M; Pawar S; Shete A; Patil D; Kumar V; Lakra R; Sarkale P; Nichol S; Mourya D	2018	Indian J Med Res	29923524
Detection of Nipah virus in Pteropus medius in 2019 outbreak from Ernakulam district, Kerala, India.	Sudeep AB; Yadav PD; Gokhale MD; Balasubramanian R; Gupta N; Shete A; Jain R; Patil S; Sahay RR; Nyayanit DA; Gopale S; Pardeshi PG; Majumdar TD; Patil DR; Sugunan AP; Mourya DT	2021	BMC Infect Dis	33563231
